# Supplementary material for: Host-associated niche metabolism controls enteric infection through fine-tuning the regulation of type 3 secretion
Source: PubMed Central journal article supplement (PMC6180029; doi:10.1038/s41467-018-06701-4), 2018-10-10
Supplement: 41467_2018_6701_MOESM1_ESM.pdf [file 41467_2018_6701_MOESM1_ESM.pdf]

**Host-associated niche metabolism controls enteric infection through fine-tuning the regulation of type 3 secretion**

Connolly *et al.*

Supplementary Information

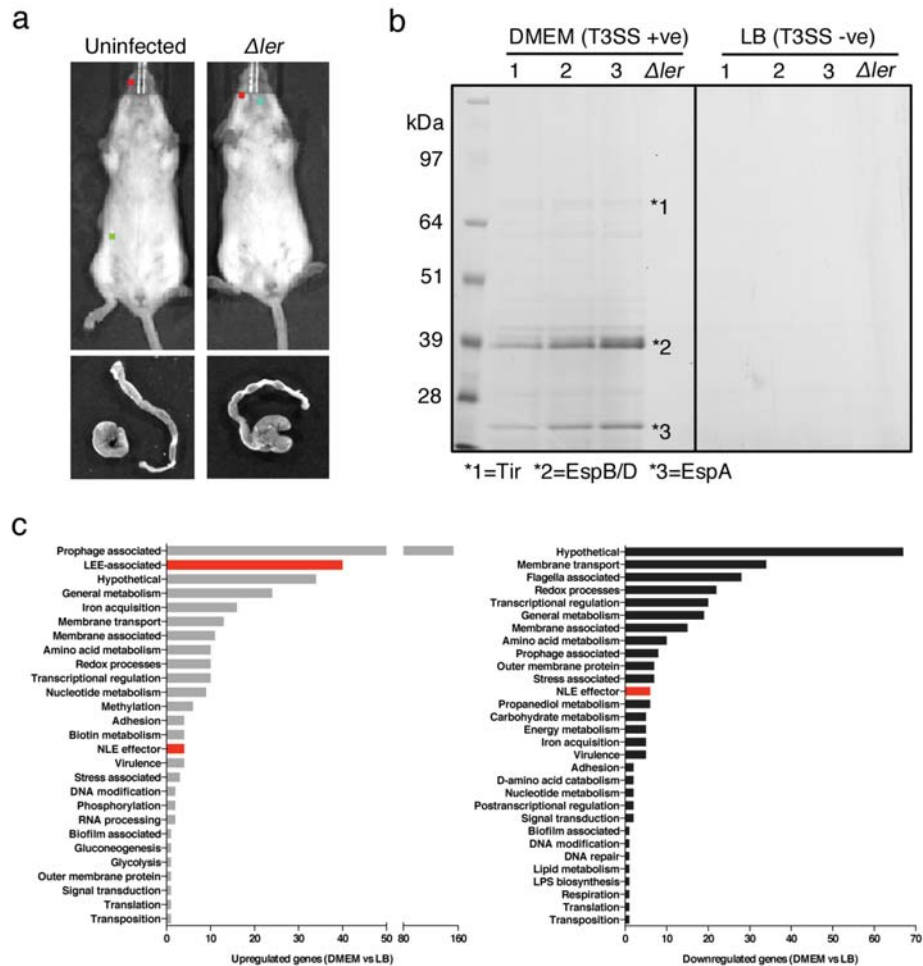

**Supplementary Figure 1.** Experimental controls for *in vivo* RNA-seq analysis. **a** IVIS images of control mice used for *in vivo* RNA-seq experiments. Images show a representative mouse from the uninfected and  $\Delta ler$  groups as well as corresponding intestine dissections. **b** SDS-PAGE gel profiling of secreted proteins from *C. rodentium* wild type cells used for *in vitro* RNA-seq. The presence of T3SS-associated secreted proteins (labelled as \*1-3) indicates the status of the conditions used (DMEM/T3SS +ve or LB/T3SS -ve respectively).  $\Delta ler$  was used as a T3SS deficient control for the secreted profiling. **c** RNA-seq analysis of *in vitro* control conditions used in this study (DMEM vs LB T3SS). The grouping of respective functional groups are listed and LEE/NLE genes are indicated in red.

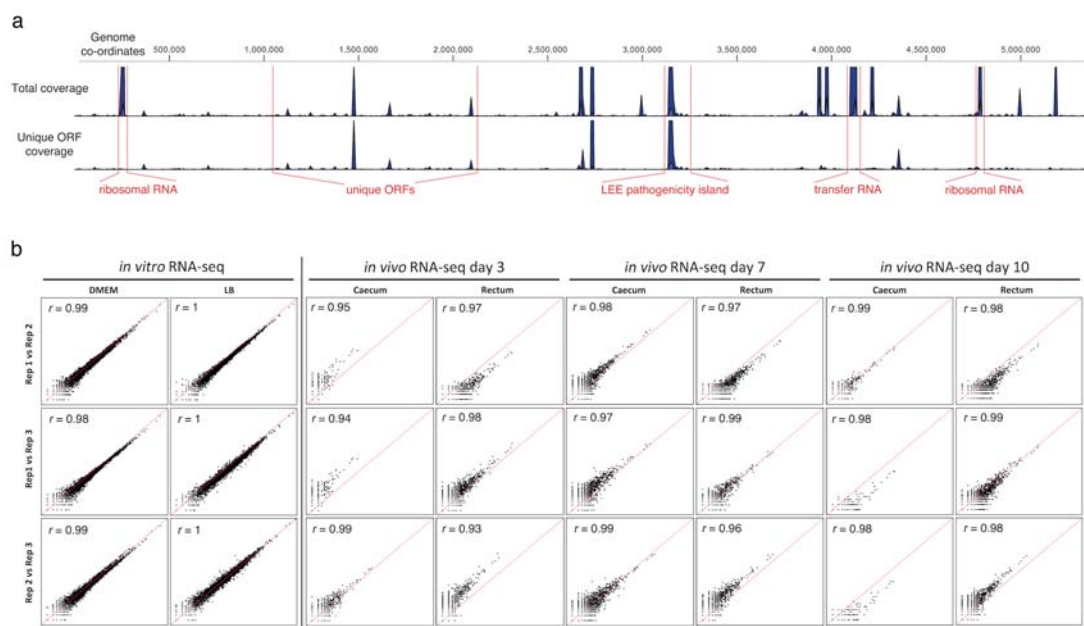

**Supplementary Figure 2.** Mapping of *in vivo* RNA-seq data. **a** Representative coverage plot of mapped RNA-seq reads illustrating the total and unique read alignment. Selected examples of reads mapped to tRNA, rRNAs (total coverage) or unique coding regions are indicated in red. **b** Normalized read counts ( $\log_2$  transformed) of genes identified by *in vitro* and *in vivo* RNA-seq in all samples tested. Replicates were compared pairwise with the Pearson correlation coefficient ( $r$ ) indicated above.

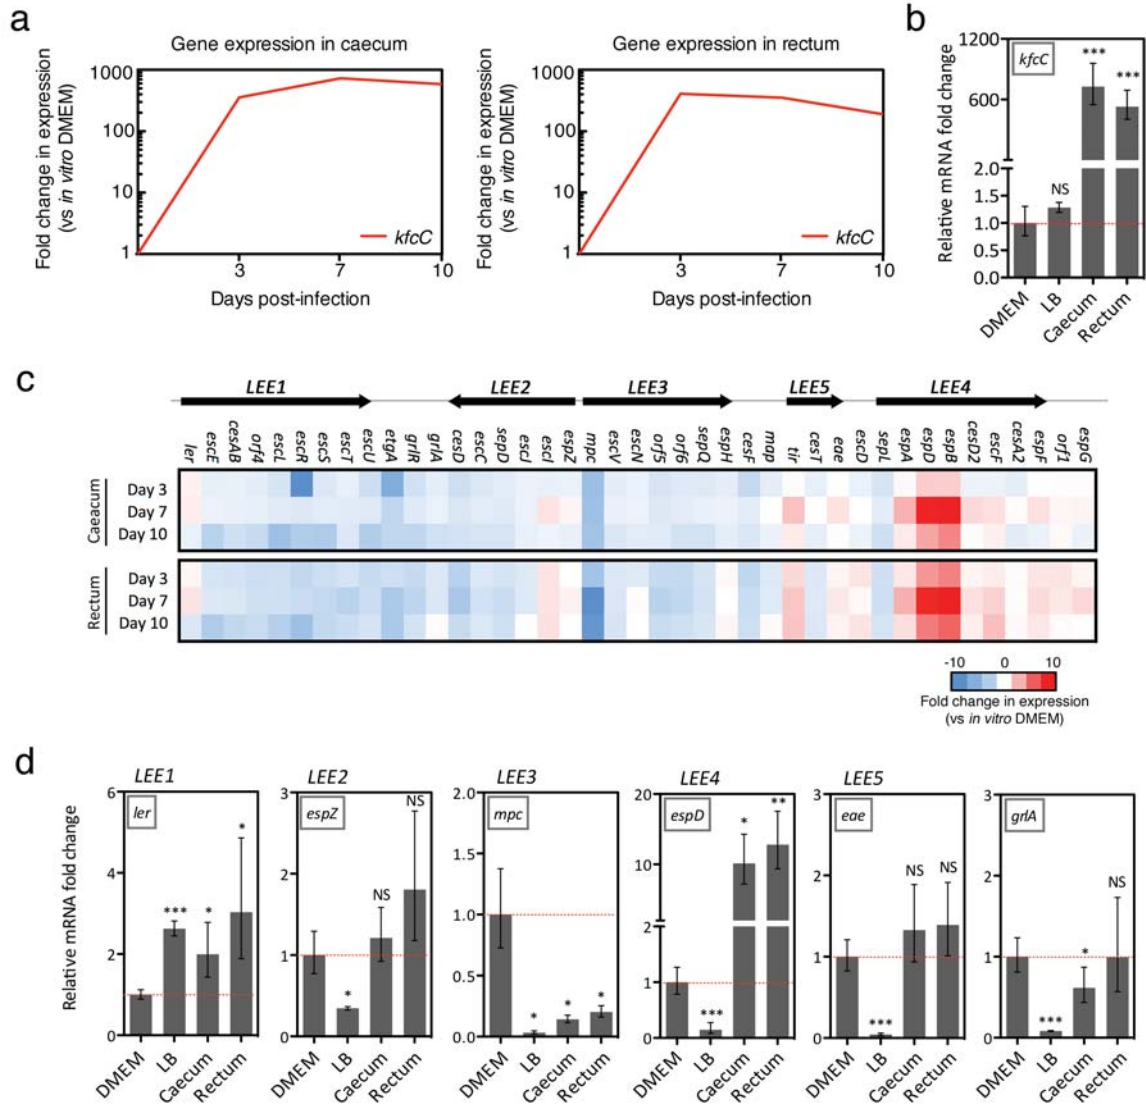

**Supplementary Figure 3.** Validation of virulence factor expression *in vivo*. **a** Line plots illustrating expression dynamics of *kfcC* during infection versus DMEM. **b** qRT-PCR validation of *kfcC* expression *in vivo*. \*\*\* and NS denote  $P \leq 0.001$  and not significant respectively as compared to baseline expression in DMEM (red dotted line). **c** Heatmap of LEE pathogenicity island fold-change in expression (EDGE test) versus growth in DMEM (T3SS +ve). All ORFs and respective LEE operons are labelled above. Each node indicates the mean of three biological replicates. The color scale is indicated below. **d** qRT-PCR validation of LEE expression *in vivo*. Selected genes from each LEE operon were analyzed. \*, \*\*, \*\*\* and NS denote  $P \leq 0.05$ ,  $P \leq 0.01$ ,  $P \leq 0.001$  and not significant respectively as compared to baseline expression in DMEM (red dotted line).

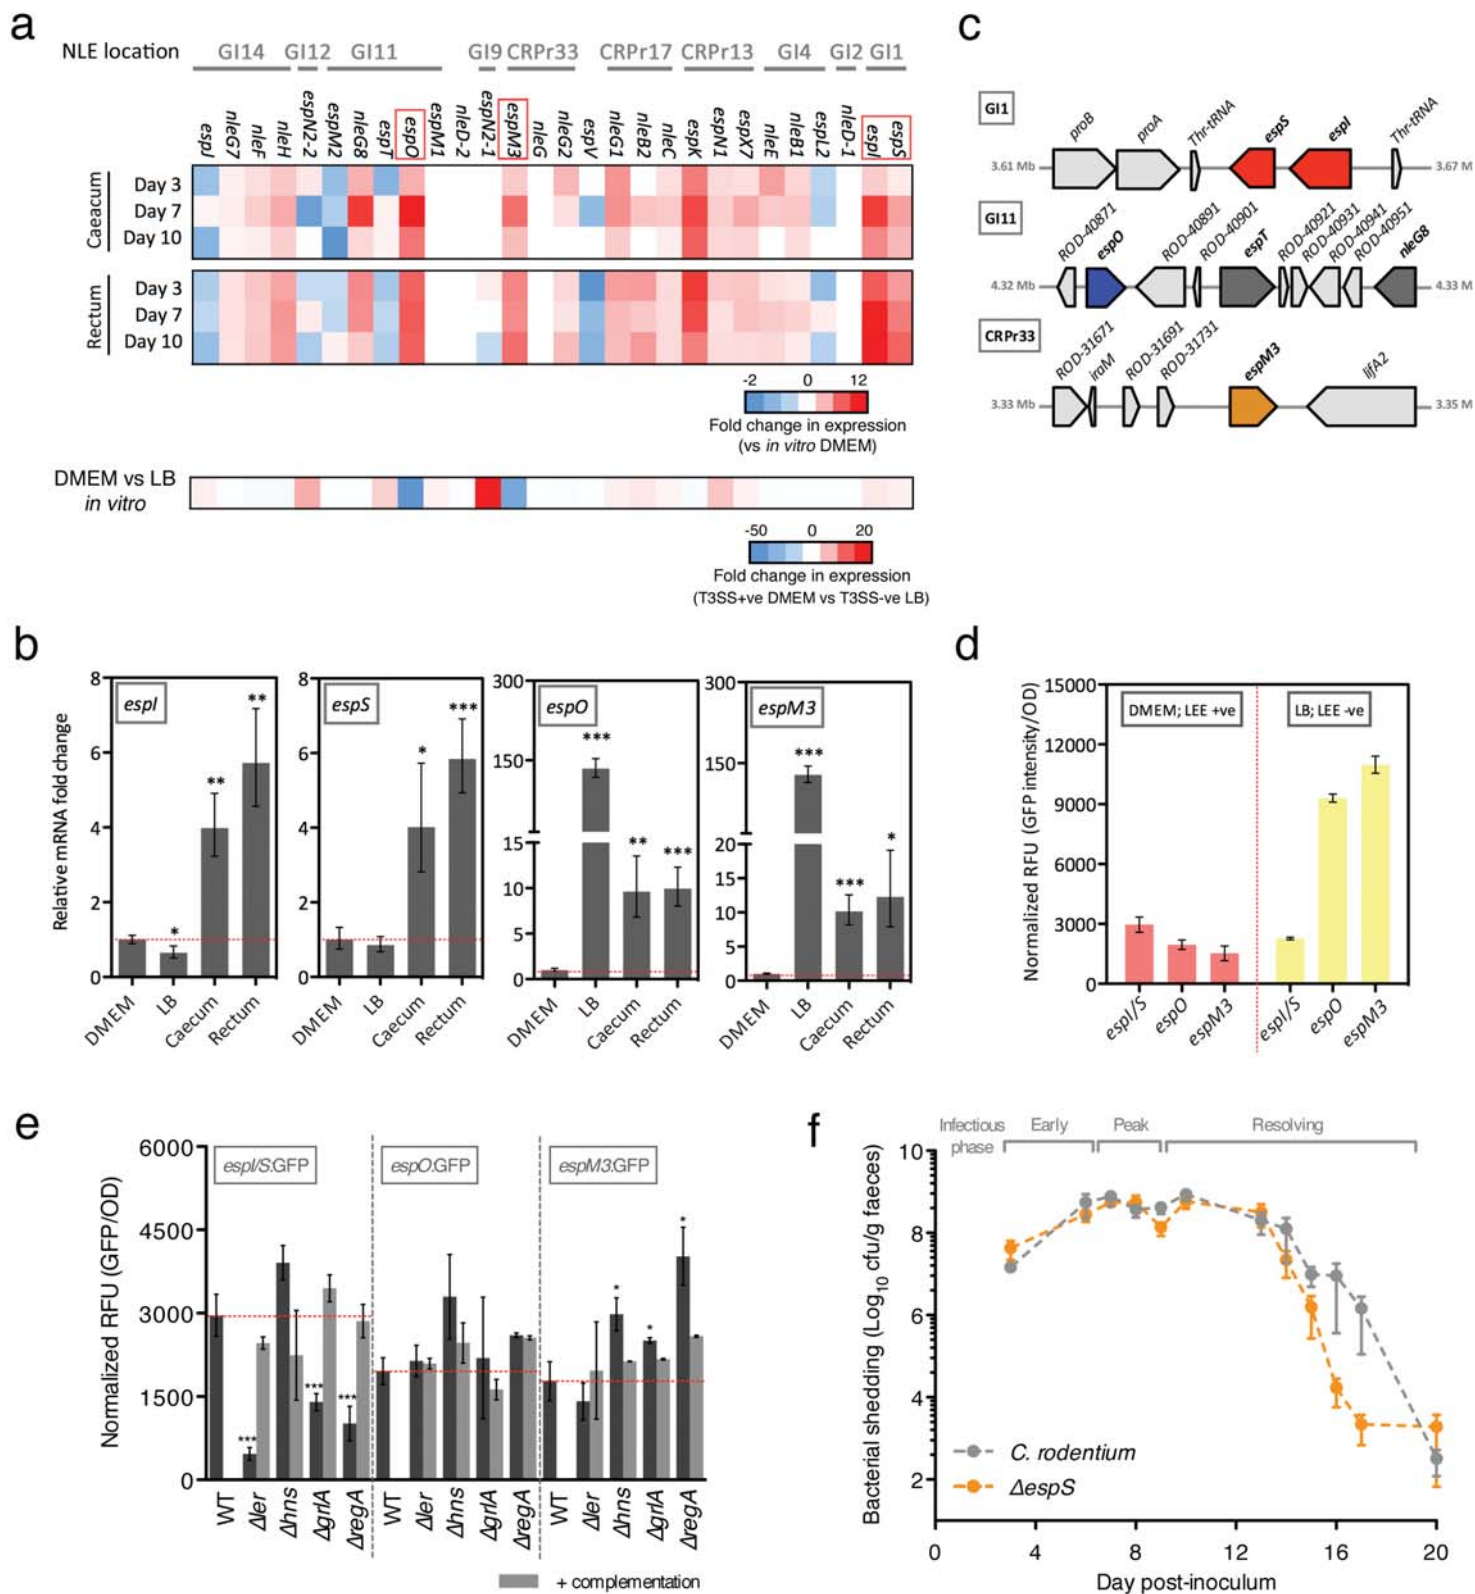

**Supplementary Figure 4.** NLE expression and regulation in *C. rodentium*. **a** Heatmaps of NLE gene fold-changes in expression *in vivo* (EDGE test) versus growth in DMEM (T3SS +ve). All NLEs and respective genomic location are labelled above. The second heatmap (below) indicates NLE fold change in expression in DMEM versus growth in LB, highlighting the heterogeneous nature of NLE expression. Each node indicates the mean of three biological replicates. The color scale for each heatmap is indicated below. **b** qRT-PCR validation of NLE expression *in vivo*. \*, \*\* and \*\*\* denote  $P \leq 0.05$ ,  $P \leq 0.01$  and  $P \leq 0.001$  respectively. **c** Genomic context of the most highly expressed NLEs *in vivo* identified by *in vivo* RNA-seq. **d** Reporter activity of *pespI/S::GFP*, *pespO::GFP* and *pespM3::GFP* in *C. rodentium* cultured in DMEM or LB to validate environmentally-dependent differential regulation of individual NLEs. Expression was measured as GFP/OD<sub>600</sub> from the mean of three biological replicates (+SEM). **e** Reporter activity of *pespI/S::GFP*, *pespO::GFP* and *pespM3::GFP* in defined regulator mutants ( $\Delta ler$ ,  $\Delta hns$ ,  $\Delta grlA$  and  $\Delta regA$ ). The red dotted lines indicate the base line expression of each reporter. Relative fluorescence units (RFU) were measured as GFP/OD<sub>600</sub> and representing the mean of three biological replicates  $\pm$  SEM. \* and \*\*\* denote  $P \leq 0.05$  and  $P \leq 0.001$  respectively compared to the wild type (Students f-test). **f** Colonization of the murine host by wild type *C. rodentium* or  $\Delta espS$ . Each data point represents the mean bacterial load ( $\pm$ SEM) in feces of infected mice (groups of  $n=5$  mice; CFU/g). The infectious phase of each sampling point is indicated above the graph.





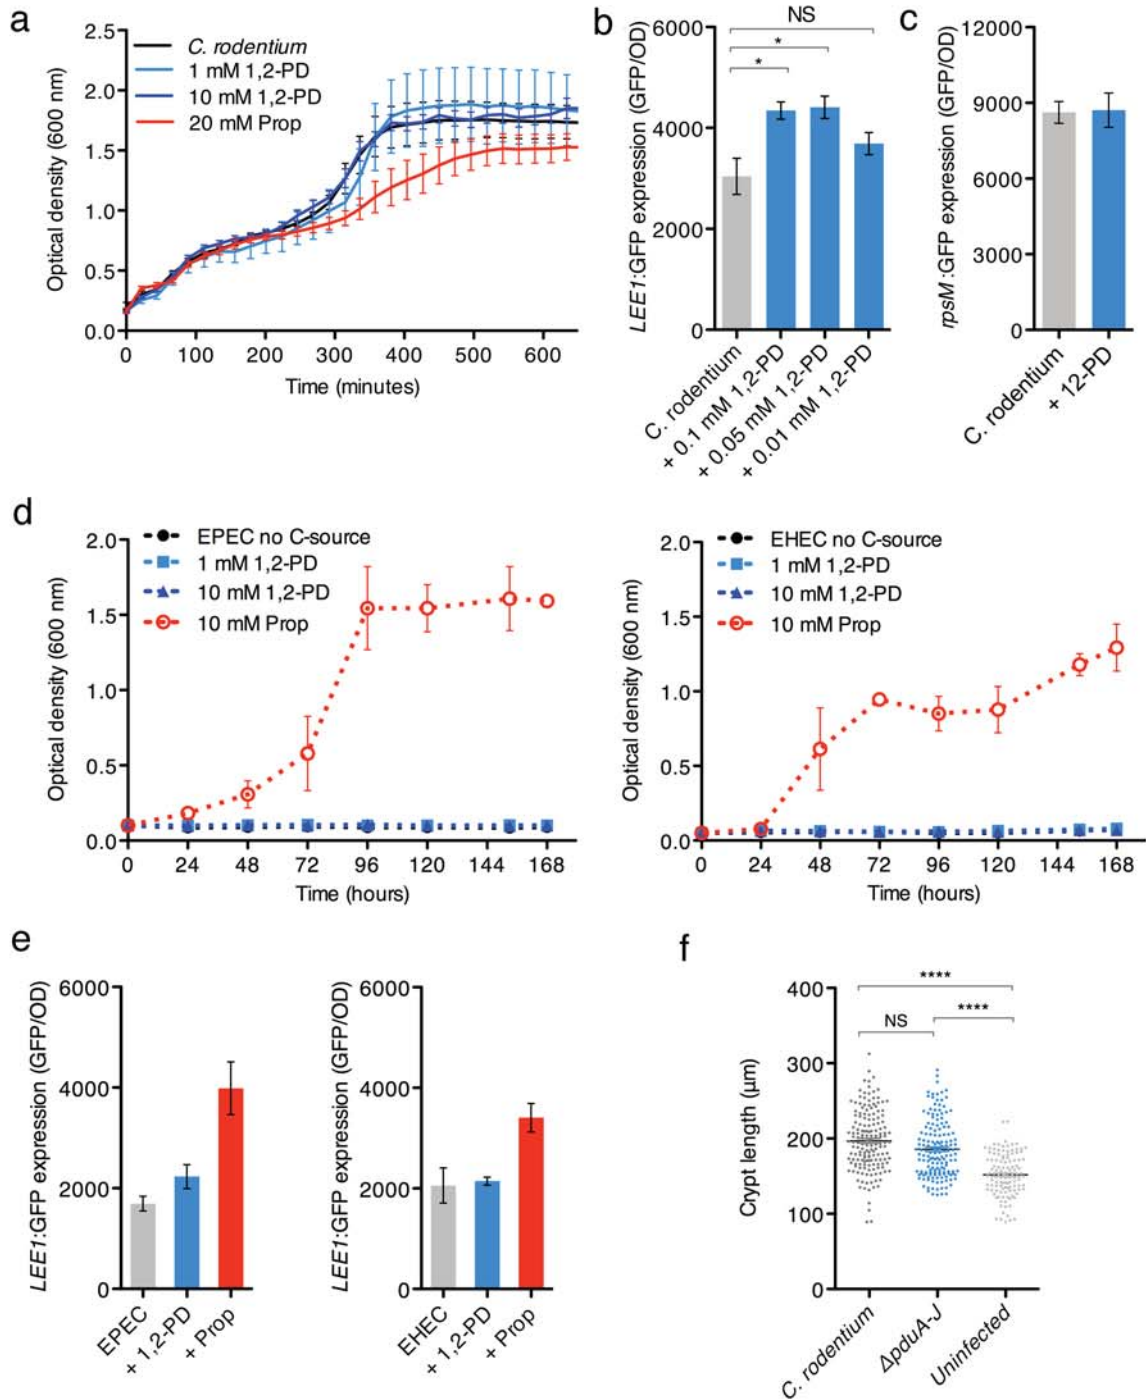

**Supplementary Figure 6.** 1,2-propanediol metabolism and virulence regulation in A/E pathotypes. **a** Growth of *C. rodentium* in DMEM supplemented with 1,2-PD or Prop. Data represents the mean optical density (600nm) of three biological replicates ( $\pm$ SEM). **b** *LEE1*:GFP reporter activity in DMEM supplemented with a gradient of 1,2-PD concentrations (0.1 mM, 0.05 mM and 0.01 mM). *LEE1* expression was measured as GFP/OD<sub>600</sub> Data represents the mean of three biological replicates  $\pm$ SEM. \* and NS denote  $P \leq 0.05$  and not significant respectively (Students t-test). **c** Reporter assay in DMEM with and without 1,2-PD supplementation (1 mM) using *C. rodentium* transformed with *prpsM*. Relative fluorescence units (RFU) were measured as GFP/OD<sub>600</sub> and the data represents the mean of three biological replicates  $\pm$ SEM. **d** Growth of EPEC and EHEC with 1,2-PD or Prop as a sole carbon source. Data represents the mean optical density (600nm) of three biological replicates ( $\pm$ SEM). **e** *prpsM*:GFP reporter activity of EPEC and EHEC in DMEM supplemented with 1,2-PD or Prop. *LEE1* expression was measured as RFU (GFP/OD<sub>600</sub>) Data represents the mean of three biological replicates  $\pm$ SEM. **f** Enumeration of colonic epithelial cell crypt length (pm) from mice infected with either wild type *C. rodentium*,  $\Delta$ *pduA-J* or uninfected controls. Sampling was carried out at peak infection (day eight PI). For quantification, \*\*\*\* and NS denote  $P \leq 0.0001$  or not significant (1-way ANOVA with Bonferroni multiple correction test).



**Supplementary Table 1.** Bacterial strains used in this study

| Name                    | Description                                                                                         | Reference                             |
|-------------------------|-----------------------------------------------------------------------------------------------------|---------------------------------------|
| <i>C. rodentium</i>     | <i>C. rodentium</i> ICC169; O152 serotype; Nalidixin resistant                                      | Petty <i>et al.</i> 2010              |
| <i>C. rodentium</i> LUX | <i>C. rodentium</i> ICC169 LUX marked at 16S locus; Erythromycin resistant                          | This study                            |
| $\Delta ler$            | <i>C. rodentium</i> ICC169 <i>ler</i> deletion mutant; Kanamycin resistant                          | This study                            |
| $\Delta ler$ LUX        | <i>C. rodentium</i> ICC169 luminescent <i>ler</i> deletion mutant; Erythromycin/Kanamycin resistant | This study                            |
| $\Delta grlA$           | <i>C. rodentium</i> ICC169 <i>grlA</i> deletion mutant; Kanamycin resistant                         | This study                            |
| $\Delta regA$           | <i>C. rodentium</i> ICC169 <i>regA</i> deletion mutant; Kanamycin resistant                         | This study                            |
| $\Delta hns$            | <i>C. rodentium</i> ICC169 <i>hns</i> deletion mutant; Kanamycin resistant                          | This study                            |
| $\Delta espS$           | <i>C. rodentium</i> ICC169 <i>espS</i> deletion mutant;                                             | This study                            |
| $\Delta pduA-J$         | <i>C. rodentium</i> ICC169 <i>pduA-J</i> deletion mutant; Kanamycin resistant                       | This study                            |
| EHEC                    | <i>E. coli</i> TUV93-0                                                                              | Campellone <i>et al.</i> , 2002       |
| EPEC                    | <i>E. coli</i> E2348/69                                                                             | Iguchi <i>et al.</i> , 2009           |
| ICC1370                 | <i>C. rodentium</i> constitutive-Pler luminescent; Nalidixin/Kanamycin resistant                    | Mullineaux-Sanders <i>et al.</i> 2017 |
| ICC1370 $\Delta pduA-J$ | <i>C. rodentium</i> constitutive-Pler luminescent; Nalidixin/Kanamycin resistant                    | This study                            |



**Supplementary Table 2.** Plasmids used in this study

| Name                           | Description                                                                                                               | Reference                            |
|--------------------------------|---------------------------------------------------------------------------------------------------------------------------|--------------------------------------|
| pKD46                          | Red recombinase system; arabinose inducible; 30°C permissive; ampicillin resistant                                        | Datsenko and Wanner 2000             |
| pCP20                          | FLP recombinase system; 30°C permissive; ampicillin resistant                                                             | Datsenko and Wanner 2000             |
| pKD4                           | Kanamycin-FRT cassette template plasmid; <i>oriRy</i> replicon; Kanamycin resistant                                       | Datsenko and Wanner 2000             |
| pSIM18                         | Temperature inducible Red recombinase system; 42°C inducible; Hygromycin resistant                                        | Chan <i>et al.</i> 2007              |
| pBAD: <i>pduA-J</i>            | <i>pduA-J</i> cloned into pBAD18; arabinose inducible; Ampicillin resistant                                               | This study                           |
| pACBSR                         | Receiver plasmid. <i>p15A</i> ori, <i>PBAD</i> , I-SceI, endonuclease and $\lambda$ -red genes; chloramphenicol resistant | Herring <i>et al.</i> , 2003         |
| pSEVA612S                      | <i>R6K</i> ori, <i>oriT</i> , I-SceI sites flanking multiple cloning site; gentamicin resistant                           | Martinez-Garcia <i>et al.</i> , 2015 |
| pSEVA612S $\Delta$ <i>espS</i> | Donor plasmid. pSEVA612S backbone containing 300 bp homology regions flanking <i>espS</i>                                 | This study                           |
| pAJR70                         | pACYC184 containing single <i>BamHI/KpnI</i> cloning site in-frame with eGFP; Chloramphenicol resistant                   | Roe <i>et al.</i> 2003               |
| <i>ppsM</i> :GFP               | pAJR70 containing <i>ppsM</i> promoter fused to <i>gfp+</i> ; Chloramphenicol resistant                                   | Roe Lab inventory                    |
| <i>pespI/S</i> :GFP            | <i>C. rodentium</i> <i>espI/S</i> promoter region cloned in-frame into pAJR70; Chloramphenicol resistant                  | This study                           |
| <i>pespO</i> :GFP              | <i>C. rodentium</i> <i>espO</i> promoter region cloned in-frame into pAJR70; Chloramphenicol resistant                    | This study                           |
| <i>pespM3</i> :GFP             | <i>C. rodentium</i> <i>espM3</i> promoter region cloned in-frame into pAJR70; Chloramphenicol resistant                   | This study                           |
| Eh <i>LEE1</i> :GFP            | EHEC <i>LEE1</i> promoter region cloned in-frame into pAJR70; Chloramphenicol resistant                                   | Roe <i>et al.</i> 2003               |
| Ep <i>LEE1</i> :GFP            | EPEC <i>LEE1</i> promoter region cloned in-frame into pAJR70; Chloramphenicol resistant                                   | This study                           |
| Cr <i>LEE1</i> :GFP            | <i>C. rodentium</i> <i>LEE1</i> promoter region cloned in-frame into pAJR70; Chloramphenicol resistant                    | This study                           |
| pWSK: <i>ler</i>               | <i>ler</i> cloned into pWSK29; IPTG inducible; Ampicillin resistant                                                       | This study                           |
| pWSK: <i>grlA</i>              | <i>grlA</i> cloned into pWSK29; IPTG inducible; Ampicillin resistant                                                      | This study                           |
| pWSK: <i>hns</i>               | <i>hns</i> cloned into pWSK29; IPTG inducible; Ampicillin resistant                                                       | This study                           |
| pWSK: <i>regA</i>              | <i>regA</i> cloned into pWSK29; IPTG inducible; Ampicillin resistant                                                      | This study                           |

**Supplementary Table 3.** Oligonucleotide primers used in this study

| Name                       | Description                       | Sequence                                                                                                                                                                                                                                                                                                                                                                                                                                                                                                                                                                                                                                                                                                                                                                                                                                                                                                                                                                                                                                                                                                                                                                                                                                                                                                                                                                                                                                                                                                                                                                                                                                                                                                                                                                                                                                                  |
|----------------------------|-----------------------------------|-----------------------------------------------------------------------------------------------------------------------------------------------------------------------------------------------------------------------------------------------------------------------------------------------------------------------------------------------------------------------------------------------------------------------------------------------------------------------------------------------------------------------------------------------------------------------------------------------------------------------------------------------------------------------------------------------------------------------------------------------------------------------------------------------------------------------------------------------------------------------------------------------------------------------------------------------------------------------------------------------------------------------------------------------------------------------------------------------------------------------------------------------------------------------------------------------------------------------------------------------------------------------------------------------------------------------------------------------------------------------------------------------------------------------------------------------------------------------------------------------------------------------------------------------------------------------------------------------------------------------------------------------------------------------------------------------------------------------------------------------------------------------------------------------------------------------------------------------------------|
| <i>ler</i> KO F            | Lambda Red knockout primer        | TGACCCATCCA TGTAAGGATGAGCTTGTTAATATCTTAATATATAAAAAGTGTG<br>AGGCTGGAGCTGCTTC<br>TATTATTTTCATCTCCAGTTCAGTTATCGTTATCATTTAATTAATTTTCATGCATATG                                                                                                                                                                                                                                                                                                                                                                                                                                                                                                                                                                                                                                                                                                                                                                                                                                                                                                                                                                                                                                                                                                                                                                                                                                                                                                                                                                                                                                                                                                                                                                                                                                                                                                                 |
| <i>ler</i> KO R            | Lambda Red knockout primer        | AATATCCTCCTTAG                                                                                                                                                                                                                                                                                                                                                                                                                                                                                                                                                                                                                                                                                                                                                                                                                                                                                                                                                                                                                                                                                                                                                                                                                                                                                                                                                                                                                                                                                                                                                                                                                                                                                                                                                                                                                                            |
| <i>ler</i> check F         | Lambda Red knockout check primer  | CCATCCATGTAAGGATGAGC                                                                                                                                                                                                                                                                                                                                                                                                                                                                                                                                                                                                                                                                                                                                                                                                                                                                                                                                                                                                                                                                                                                                                                                                                                                                                                                                                                                                                                                                                                                                                                                                                                                                                                                                                                                                                                      |
| <i>ler</i> check R         | Lambda Red knockout check primer  | TGCAATGAGCAGTTCCCTTTG<br>TTTTATTGTTTTTTGTGTTAAATTTTTTATCAAATAAAAAGAACATGGAAAGTGTA<br>GGCTGGAGCTGCTTC<br>AATAGGGATCTTTTTTTTATTATTCTATAAACTTACTAAGAAAGCTACGTCATAT                                                                                                                                                                                                                                                                                                                                                                                                                                                                                                                                                                                                                                                                                                                                                                                                                                                                                                                                                                                                                                                                                                                                                                                                                                                                                                                                                                                                                                                                                                                                                                                                                                                                                           |
| <i>griA</i> KO F           | Lambda Red knockout primer        | GAATATCCTCCTTAG                                                                                                                                                                                                                                                                                                                                                                                                                                                                                                                                                                                                                                                                                                                                                                                                                                                                                                                                                                                                                                                                                                                                                                                                                                                                                                                                                                                                                                                                                                                                                                                                                                                                                                                                                                                                                                           |
| <i>griA</i> KO R           | Lambda Red knockout primer        | GGCGAACAGAATAAACTCAG                                                                                                                                                                                                                                                                                                                                                                                                                                                                                                                                                                                                                                                                                                                                                                                                                                                                                                                                                                                                                                                                                                                                                                                                                                                                                                                                                                                                                                                                                                                                                                                                                                                                                                                                                                                                                                      |
| <i>griA</i> check F        | Lambda Red knockout check primer  | ATGTCAGATTTATCGAACCG                                                                                                                                                                                                                                                                                                                                                                                                                                                                                                                                                                                                                                                                                                                                                                                                                                                                                                                                                                                                                                                                                                                                                                                                                                                                                                                                                                                                                                                                                                                                                                                                                                                                                                                                                                                                                                      |
| <i>griA</i> check R        | Lambda Red knockout check primer  | CATACATTTTTTTATTAATCGCCCCTTTTAAAACACCGGACAACATACTGTGT<br>AGGCTGGAGCTGCTTC<br>AACCTGTTCAAGGTAGCAGGCTCTACCAGAGAAAAATCAGAGTTAATACAAGCA<br>TATGAATATCCTCCTTAG<br>ACATTA TTTTATTAATCGCCC<br>TAGCAGGCTCTACCAGAGAA<br>TAGCTGATAACCCATGAAATTTATTCATACAAAGCATGGGGGTGACTGTGTG<br>TAGGCTGGAGCTGCTTC<br>GCTAAACGTATCAGAACATAACCTGAAGAACTGCTAACTACCCGGATCGTCA<br>TATGAATATCCTCCTTAG<br>AGCTGATAACCCATGAAATTA<br>CGTATCAGAACATAACCTGAAG<br>CCCTCTAGACCATCCATGTAAGGATGAG<br>CCCGGATCCTTAAATGTTATTCAGAG<br>CCGAGCTCAAGAACATGGAAAATGG<br>CCGGATCCCTAACTCTCCTTTTTTCGTC<br>CCGAGCTCATAAGTTTGAGATTACTACA<br>CCGGATCCTTATTCCTTGATCAGGAAATC<br>CCGAGCTCCAAAGCATGGGGGTGACTGT<br>CCGGATCCTCACGGCTGTTCTTCACT<br>TCGCTCTTTTTATAGTCAGCAATATCGGGACAATCCAGGCGAGGTCTTTGTGT<br>AGGCTGGAGCTGCTTC<br>TTCAAAGTAATCCCAAGTATTGCTTCACGCTGTGCTCCTTTTCGACAGTACCATA<br>TGAATATCCTCCTTAG<br>TTTTAGCCCGAGCGTTAAG<br>ATGGCTAATGCCAGACCACT<br>CTAGCGAATTCGAGCTCG<br>CCCCAAAAACGGGTATGG<br>GTTTTCTCCATACCCGTTTTTTTTGGGAATCCAGGCGAGGTCTTTATG<br>GAAACGATAAGGACGCAGGGCGTTGTAATCTC<br>TACAACGCCCTGCGTCTTATCGTTCAACGAAAGAG<br>CGGGTACCGAGCTCGAATTCGCTAGACGCTGTGCTCCTTTTCG<br>ATCCCCTTAA TAAGCAGAGAGGTAAAAGAG<br>TTATTCATTTAAAAATAATAGCTGAAATGG<br>CCGGATCCCACCAAATACAATTAATTGAT<br>CCGGTACCGGTGATCCGGAATGTATGTT<br>CCGGATCCGGACAAAAATATAAACTGCTT<br>CCGGTACCAGCAGTGAAAAATATATTTCT<br>CCGGATCCTACCCCTGCAATAATGGTAT<br>CCGGTACCAGAAATTAAGAGATAAACCTTG<br>CCGGATCCGGCAAATCGGGTACGCGATCT<br>CCGGTACCCTCAATCAGCTGAATGTATGG<br>CCGGATCCCGAAATTAAGTAGAGTATAGTG<br>CCGGTACCCTCTATAAGCTGAATGTATGG<br>ATGGTGATGCAAGGAGAT<br>CAGATGAACCTCAGGGTCAG<br>GAGCAGGAGATTCAAACTGT<br>TACCCAGTTCTTGTAAAGT<br>GTAAATTCAGGAGAAATGG<br>AATAAATGACGCTCTCCTCA<br>GCTACGGCTATTTCAAGTAT<br>GATGGGGCAAAGATTTAAC<br>TTATTCATGGTTTTTGACCC<br>AAAACAATCCTAAACCAGCA<br>TTTTATTGAGGTAATGGTGG<br>AGGGCACTGAAGAAAGAAA<br>CTGCAATAAATGGAAATGGT |
| <i>regA</i> KO F           | Lambda Red knockout primer        |                                                                                                                                                                                                                                                                                                                                                                                                                                                                                                                                                                                                                                                                                                                                                                                                                                                                                                                                                                                                                                                                                                                                                                                                                                                                                                                                                                                                                                                                                                                                                                                                                                                                                                                                                                                                                                                           |
| <i>regA</i> KO R           | Lambda Red knockout primer        |                                                                                                                                                                                                                                                                                                                                                                                                                                                                                                                                                                                                                                                                                                                                                                                                                                                                                                                                                                                                                                                                                                                                                                                                                                                                                                                                                                                                                                                                                                                                                                                                                                                                                                                                                                                                                                                           |
| <i>regA</i> check F        | Lambda Red knockout check primer  |                                                                                                                                                                                                                                                                                                                                                                                                                                                                                                                                                                                                                                                                                                                                                                                                                                                                                                                                                                                                                                                                                                                                                                                                                                                                                                                                                                                                                                                                                                                                                                                                                                                                                                                                                                                                                                                           |
| <i>regA</i> check R        | Lambda Red knockout check primer  |                                                                                                                                                                                                                                                                                                                                                                                                                                                                                                                                                                                                                                                                                                                                                                                                                                                                                                                                                                                                                                                                                                                                                                                                                                                                                                                                                                                                                                                                                                                                                                                                                                                                                                                                                                                                                                                           |
| <i>ler</i> pWSK F          | Complementation plasmid primer    |                                                                                                                                                                                                                                                                                                                                                                                                                                                                                                                                                                                                                                                                                                                                                                                                                                                                                                                                                                                                                                                                                                                                                                                                                                                                                                                                                                                                                                                                                                                                                                                                                                                                                                                                                                                                                                                           |
| <i>ler</i> pWSK R          | Complementation plasmid primer    |                                                                                                                                                                                                                                                                                                                                                                                                                                                                                                                                                                                                                                                                                                                                                                                                                                                                                                                                                                                                                                                                                                                                                                                                                                                                                                                                                                                                                                                                                                                                                                                                                                                                                                                                                                                                                                                           |
| <i>griA</i> pWSK F         | Complementation plasmid primer    |                                                                                                                                                                                                                                                                                                                                                                                                                                                                                                                                                                                                                                                                                                                                                                                                                                                                                                                                                                                                                                                                                                                                                                                                                                                                                                                                                                                                                                                                                                                                                                                                                                                                                                                                                                                                                                                           |
| <i>griA</i> pWSK R         | Complementation plasmid primer    |                                                                                                                                                                                                                                                                                                                                                                                                                                                                                                                                                                                                                                                                                                                                                                                                                                                                                                                                                                                                                                                                                                                                                                                                                                                                                                                                                                                                                                                                                                                                                                                                                                                                                                                                                                                                                                                           |
| <i>hns</i> pWSK F          | Complementation plasmid primer    |                                                                                                                                                                                                                                                                                                                                                                                                                                                                                                                                                                                                                                                                                                                                                                                                                                                                                                                                                                                                                                                                                                                                                                                                                                                                                                                                                                                                                                                                                                                                                                                                                                                                                                                                                                                                                                                           |
| <i>hns</i> pWSK R          | Complementation plasmid primer    |                                                                                                                                                                                                                                                                                                                                                                                                                                                                                                                                                                                                                                                                                                                                                                                                                                                                                                                                                                                                                                                                                                                                                                                                                                                                                                                                                                                                                                                                                                                                                                                                                                                                                                                                                                                                                                                           |
| <i>regA</i> pWSK F         | Complementation plasmid primer    |                                                                                                                                                                                                                                                                                                                                                                                                                                                                                                                                                                                                                                                                                                                                                                                                                                                                                                                                                                                                                                                                                                                                                                                                                                                                                                                                                                                                                                                                                                                                                                                                                                                                                                                                                                                                                                                           |
| <i>regA</i> pWSK R         | Complementation plasmid primer    |                                                                                                                                                                                                                                                                                                                                                                                                                                                                                                                                                                                                                                                                                                                                                                                                                                                                                                                                                                                                                                                                                                                                                                                                                                                                                                                                                                                                                                                                                                                                                                                                                                                                                                                                                                                                                                                           |
| <i>pduA-J</i> KO F         | Lambda Red knockout primer        |                                                                                                                                                                                                                                                                                                                                                                                                                                                                                                                                                                                                                                                                                                                                                                                                                                                                                                                                                                                                                                                                                                                                                                                                                                                                                                                                                                                                                                                                                                                                                                                                                                                                                                                                                                                                                                                           |
| <i>pduA-J</i> KO R         | Lambda Red knockout primer        |                                                                                                                                                                                                                                                                                                                                                                                                                                                                                                                                                                                                                                                                                                                                                                                                                                                                                                                                                                                                                                                                                                                                                                                                                                                                                                                                                                                                                                                                                                                                                                                                                                                                                                                                                                                                                                                           |
| <i>pduA-J</i> check F      | Lambda Red knockout check primer  |                                                                                                                                                                                                                                                                                                                                                                                                                                                                                                                                                                                                                                                                                                                                                                                                                                                                                                                                                                                                                                                                                                                                                                                                                                                                                                                                                                                                                                                                                                                                                                                                                                                                                                                                                                                                                                                           |
| <i>pduA-J</i> check R      | Lambda Red knockout check primer  |                                                                                                                                                                                                                                                                                                                                                                                                                                                                                                                                                                                                                                                                                                                                                                                                                                                                                                                                                                                                                                                                                                                                                                                                                                                                                                                                                                                                                                                                                                                                                                                                                                                                                                                                                                                                                                                           |
| pBAD18 F                   | NEBuilder custom assembly primer  |                                                                                                                                                                                                                                                                                                                                                                                                                                                                                                                                                                                                                                                                                                                                                                                                                                                                                                                                                                                                                                                                                                                                                                                                                                                                                                                                                                                                                                                                                                                                                                                                                                                                                                                                                                                                                                                           |
| pBAD18 R                   | NEBuilder custom assembly primer  |                                                                                                                                                                                                                                                                                                                                                                                                                                                                                                                                                                                                                                                                                                                                                                                                                                                                                                                                                                                                                                                                                                                                                                                                                                                                                                                                                                                                                                                                                                                                                                                                                                                                                                                                                                                                                                                           |
| <i>pduA-J</i> fragment 1 F | NEBuilder custom assembly primer  |                                                                                                                                                                                                                                                                                                                                                                                                                                                                                                                                                                                                                                                                                                                                                                                                                                                                                                                                                                                                                                                                                                                                                                                                                                                                                                                                                                                                                                                                                                                                                                                                                                                                                                                                                                                                                                                           |
| <i>pduA-J</i> fragment 1 R | NEBuilder custom assembly primer  |                                                                                                                                                                                                                                                                                                                                                                                                                                                                                                                                                                                                                                                                                                                                                                                                                                                                                                                                                                                                                                                                                                                                                                                                                                                                                                                                                                                                                                                                                                                                                                                                                                                                                                                                                                                                                                                           |
| <i>pduA-J</i> fragment 2 F | NEBuilder custom assembly primer  |                                                                                                                                                                                                                                                                                                                                                                                                                                                                                                                                                                                                                                                                                                                                                                                                                                                                                                                                                                                                                                                                                                                                                                                                                                                                                                                                                                                                                                                                                                                                                                                                                                                                                                                                                                                                                                                           |
| <i>pduA-J</i> fragment 2 R | NEBuilder custom assembly primer  |                                                                                                                                                                                                                                                                                                                                                                                                                                                                                                                                                                                                                                                                                                                                                                                                                                                                                                                                                                                                                                                                                                                                                                                                                                                                                                                                                                                                                                                                                                                                                                                                                                                                                                                                                                                                                                                           |
| <i>espS</i> check F        | Triparental conjugation           |                                                                                                                                                                                                                                                                                                                                                                                                                                                                                                                                                                                                                                                                                                                                                                                                                                                                                                                                                                                                                                                                                                                                                                                                                                                                                                                                                                                                                                                                                                                                                                                                                                                                                                                                                                                                                                                           |
| <i>espS</i> check R        | Triparental conjugation           |                                                                                                                                                                                                                                                                                                                                                                                                                                                                                                                                                                                                                                                                                                                                                                                                                                                                                                                                                                                                                                                                                                                                                                                                                                                                                                                                                                                                                                                                                                                                                                                                                                                                                                                                                                                                                                                           |
| <i>espl</i> pAJR70 F       | promoter-eGFP fusion cloning      |                                                                                                                                                                                                                                                                                                                                                                                                                                                                                                                                                                                                                                                                                                                                                                                                                                                                                                                                                                                                                                                                                                                                                                                                                                                                                                                                                                                                                                                                                                                                                                                                                                                                                                                                                                                                                                                           |
| <i>espl</i> pAJR70 R       | promoter-eGFP fusion cloning      |                                                                                                                                                                                                                                                                                                                                                                                                                                                                                                                                                                                                                                                                                                                                                                                                                                                                                                                                                                                                                                                                                                                                                                                                                                                                                                                                                                                                                                                                                                                                                                                                                                                                                                                                                                                                                                                           |
| <i>espO</i> pAJR70 F       | promoter-eGFP fusion cloning      |                                                                                                                                                                                                                                                                                                                                                                                                                                                                                                                                                                                                                                                                                                                                                                                                                                                                                                                                                                                                                                                                                                                                                                                                                                                                                                                                                                                                                                                                                                                                                                                                                                                                                                                                                                                                                                                           |
| <i>espO</i> pAJR70 R       | promoter-eGFP fusion cloning      |                                                                                                                                                                                                                                                                                                                                                                                                                                                                                                                                                                                                                                                                                                                                                                                                                                                                                                                                                                                                                                                                                                                                                                                                                                                                                                                                                                                                                                                                                                                                                                                                                                                                                                                                                                                                                                                           |
| <i>espM3</i> pAJR70 F      | promoter-eGFP fusion cloning      |                                                                                                                                                                                                                                                                                                                                                                                                                                                                                                                                                                                                                                                                                                                                                                                                                                                                                                                                                                                                                                                                                                                                                                                                                                                                                                                                                                                                                                                                                                                                                                                                                                                                                                                                                                                                                                                           |
| <i>espM3</i> pAJR70 R      | promoter-eGFP fusion cloning      |                                                                                                                                                                                                                                                                                                                                                                                                                                                                                                                                                                                                                                                                                                                                                                                                                                                                                                                                                                                                                                                                                                                                                                                                                                                                                                                                                                                                                                                                                                                                                                                                                                                                                                                                                                                                                                                           |
| <i>Cr LEE1</i> pAJR70 F    | promoter-eGFP fusion cloning      |                                                                                                                                                                                                                                                                                                                                                                                                                                                                                                                                                                                                                                                                                                                                                                                                                                                                                                                                                                                                                                                                                                                                                                                                                                                                                                                                                                                                                                                                                                                                                                                                                                                                                                                                                                                                                                                           |
| <i>Cr LEE1</i> pAJR70 R    | promoter-eGFP fusion cloning      |                                                                                                                                                                                                                                                                                                                                                                                                                                                                                                                                                                                                                                                                                                                                                                                                                                                                                                                                                                                                                                                                                                                                                                                                                                                                                                                                                                                                                                                                                                                                                                                                                                                                                                                                                                                                                                                           |
| <i>Ep LEE1</i> pAJR70 F    | promoter-eGFP fusion cloning      |                                                                                                                                                                                                                                                                                                                                                                                                                                                                                                                                                                                                                                                                                                                                                                                                                                                                                                                                                                                                                                                                                                                                                                                                                                                                                                                                                                                                                                                                                                                                                                                                                                                                                                                                                                                                                                                           |
| <i>Ep LEE1</i> pAJR70 R    | promoter-eGFP fusion cloning      |                                                                                                                                                                                                                                                                                                                                                                                                                                                                                                                                                                                                                                                                                                                                                                                                                                                                                                                                                                                                                                                                                                                                                                                                                                                                                                                                                                                                                                                                                                                                                                                                                                                                                                                                                                                                                                                           |
| pAJR70 check F             | promoter-eGFP fusion check primer |                                                                                                                                                                                                                                                                                                                                                                                                                                                                                                                                                                                                                                                                                                                                                                                                                                                                                                                                                                                                                                                                                                                                                                                                                                                                                                                                                                                                                                                                                                                                                                                                                                                                                                                                                                                                                                                           |
| pAJR70 check R             | promoter-eGFP fusion check primer |                                                                                                                                                                                                                                                                                                                                                                                                                                                                                                                                                                                                                                                                                                                                                                                                                                                                                                                                                                                                                                                                                                                                                                                                                                                                                                                                                                                                                                                                                                                                                                                                                                                                                                                                                                                                                                                           |
| <i>ler</i> qPCR F          | qRT-PCR primer                    |                                                                                                                                                                                                                                                                                                                                                                                                                                                                                                                                                                                                                                                                                                                                                                                                                                                                                                                                                                                                                                                                                                                                                                                                                                                                                                                                                                                                                                                                                                                                                                                                                                                                                                                                                                                                                                                           |
| <i>ler</i> qPCR R          | qRT-PCR primer                    |                                                                                                                                                                                                                                                                                                                                                                                                                                                                                                                                                                                                                                                                                                                                                                                                                                                                                                                                                                                                                                                                                                                                                                                                                                                                                                                                                                                                                                                                                                                                                                                                                                                                                                                                                                                                                                                           |
| <i>griA</i> qPCR F         | qRT-PCR primer                    |                                                                                                                                                                                                                                                                                                                                                                                                                                                                                                                                                                                                                                                                                                                                                                                                                                                                                                                                                                                                                                                                                                                                                                                                                                                                                                                                                                                                                                                                                                                                                                                                                                                                                                                                                                                                                                                           |
| <i>griA</i> qPCR R         | qRT-PCR primer                    |                                                                                                                                                                                                                                                                                                                                                                                                                                                                                                                                                                                                                                                                                                                                                                                                                                                                                                                                                                                                                                                                                                                                                                                                                                                                                                                                                                                                                                                                                                                                                                                                                                                                                                                                                                                                                                                           |
| <i>espD</i> qPCR F         | qRT-PCR primer                    |                                                                                                                                                                                                                                                                                                                                                                                                                                                                                                                                                                                                                                                                                                                                                                                                                                                                                                                                                                                                                                                                                                                                                                                                                                                                                                                                                                                                                                                                                                                                                                                                                                                                                                                                                                                                                                                           |
| <i>espD</i> qPCR R         | qRT-PCR primer                    |                                                                                                                                                                                                                                                                                                                                                                                                                                                                                                                                                                                                                                                                                                                                                                                                                                                                                                                                                                                                                                                                                                                                                                                                                                                                                                                                                                                                                                                                                                                                                                                                                                                                                                                                                                                                                                                           |
| <i>eae</i> qPCR F          | qRT-PCR primer                    |                                                                                                                                                                                                                                                                                                                                                                                                                                                                                                                                                                                                                                                                                                                                                                                                                                                                                                                                                                                                                                                                                                                                                                                                                                                                                                                                                                                                                                                                                                                                                                                                                                                                                                                                                                                                                                                           |
| <i>eae</i> qPCR R          | qRT-PCR primer                    |                                                                                                                                                                                                                                                                                                                                                                                                                                                                                                                                                                                                                                                                                                                                                                                                                                                                                                                                                                                                                                                                                                                                                                                                                                                                                                                                                                                                                                                                                                                                                                                                                                                                                                                                                                                                                                                           |
| <i>mpc</i> qPCR F          | qRT-PCR primer                    |                                                                                                                                                                                                                                                                                                                                                                                                                                                                                                                                                                                                                                                                                                                                                                                                                                                                                                                                                                                                                                                                                                                                                                                                                                                                                                                                                                                                                                                                                                                                                                                                                                                                                                                                                                                                                                                           |
| <i>mpc</i> qPCR R          | qRT-PCR primer                    |                                                                                                                                                                                                                                                                                                                                                                                                                                                                                                                                                                                                                                                                                                                                                                                                                                                                                                                                                                                                                                                                                                                                                                                                                                                                                                                                                                                                                                                                                                                                                                                                                                                                                                                                                                                                                                                           |
| <i>espZ</i> qPCR F         | qRT-PCR primer                    |                                                                                                                                                                                                                                                                                                                                                                                                                                                                                                                                                                                                                                                                                                                                                                                                                                                                                                                                                                                                                                                                                                                                                                                                                                                                                                                                                                                                                                                                                                                                                                                                                                                                                                                                                                                                                                                           |

|                     |                |                      |
|---------------------|----------------|----------------------|
| <i>espZ</i> qPCR R  | qRT-PCR primer | AAAACTCTGACATTGGGACT |
| <i>gapA</i> qPCR F  | qRT-PCR primer | GTAGGTATCAACGGTTTTGG |
| <i>gapA</i> qPCR R  | qRT-PCR primer | CGTCTAACAGGTCGTTGATT |
| <i>espI</i> qPCR F  | qRT-PCR primer | TGAACATTCAACCGAACATA |
| <i>espI</i> qPCR R  | qRT-PCR primer | GCTAGAGACAGGCACTTGTT |
| <i>espS</i> qPCR F  | qRT-PCR primer | TAGGTATTCTGGCAAAGG   |
| <i>espS</i> qPCR R  | qRT-PCR primer | TCCTACGGATTTTTCACCTA |
| <i>espO</i> qPCR F  | qRT-PCR primer | GGCCTGTAATTGATAAACCA |
| <i>espO</i> qPCR R  | qRT-PCR primer | TGGTCCTTCTGTTTATGACC |
| <i>espM3</i> qPCR F | qRT-PCR primer | GTTGTAAAATGCTCAATGGG |
| <i>espM3</i> qPCR R | qRT-PCR primer | TTTAGTACTCTGCCGGGTTA |
| <i>kfcC</i> qPCR F  | qRT-PCR primer | ACTGTTAATTTTATGGGGGC |
| <i>kfcC</i> qPCR R  | qRT-PCR primer | GTTCTAAGTCAACTGGC    |



### **Supplementary references**

Campellone, K.G., Giese, A., Tipper, D.J., and Leong, J.M. (2002). A tyrosine-phosphorylated 12-amino-acid sequence of enteropathogenic *Escherichia coli* Tir binds the host adaptor protein Nck and is required for Nck localization to actin pedestals. *Mol. Microbiol.* *43*, 1227– 1241.

Iguchi, A., Thomson, N.R., Ogura, Y., Saunders, D., Ooka, T., Henderson, I.R., Harris, D., Asadulghani, M., Kurokawa, K., Dean, P., et al. (2009). Complete genome sequence and comparative genome analysis of enteropathogenic *Escherichia coli* O127:H6 strain E2348/69. *J. Bacteriol.* *191*, 347–354.
