# Supplementary material for: Host-associated niche metabolism controls enteric infection through fine-tuning the regulation of type 3 secretion
Source: PubMed Central journal article supplement (PMC6180029; doi:10.1038/s41467-018-06701-4), 2018-10-10
Supplement: 41467_2018_6701_MOESM3_ESM.pdf [file 41467_2018_6701_MOESM3_ESM.pdf]

## Description of Additional Supplementary Files

File Name: Supplementary Data 1

Description: Table of the mapping statistics from *in vivo* and *in vitro* RNA-seq experiments.

File Name: Supplementary Data 2

Description: Edge test results for RNA-seq data comparisons between *in vivo* and *in vitro* samples.

File Name: Supplementary Data 3

Description: Edge test results for RNA-seq data comparisons between *in vitro* cultured samples.

File Name: Supplementary Data 4

Description: Gene ontology (GO) analysis of DEGs identified by RNA-seq.
